# Supplementary material for: Prognostic impact of a novel gene expression profile classifier for the discrimination between metastatic and non-metastatic primary colorectal cancer tumors
Source: PubMed Central journal article supplement (PMC5746100; doi:10.18632/oncotarget.22591), 2017-11-21
Supplement: oncotarget-08-107685-s001.pdf [file oncotarget-08-107685-s001.pdf]

# Prognostic impact of a novel gene expression profile classifier for the discrimination between metastatic and non-metastatic primary colorectal cancer tumors

## SUPPLEMENTARY MATERIALS

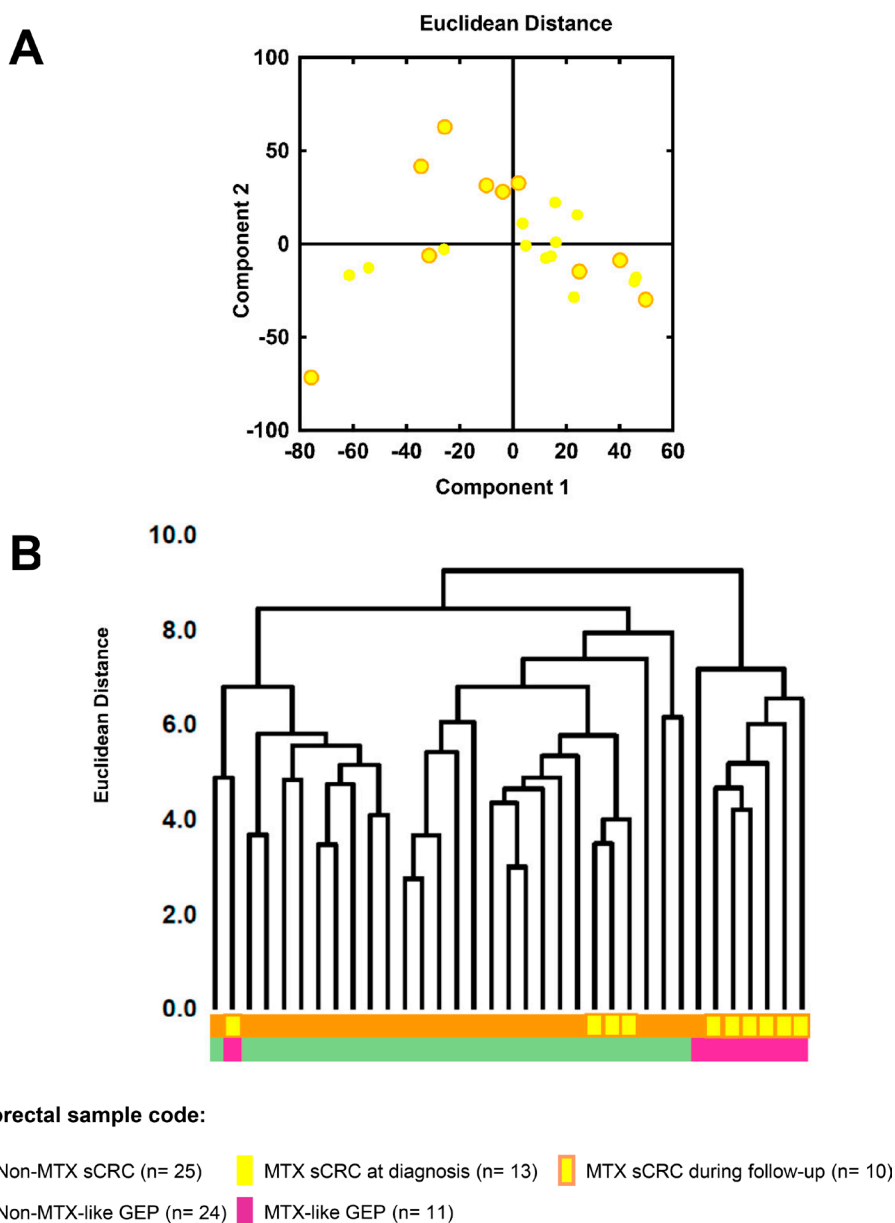

**Supplementary Figure 1:** GEP of metastatic sCRC tumors which presented liver metastasis at diagnosis vs. follow-up (panel **A**) and validation of the discrimination power of the 19-gene GEP-classifier in sCRC tumors without metastatic dissemination at diagnosis (panel **B**). In panel **A**, unsupervised multidimensional scaling scatterplot of sCRC patients who presented with liver metastasis at diagnosis (colored yellow;  $n = 13$ ) vs. follow-up (colored yellow with orange frames;  $n = 10$ ) based on the global-coding (mRNA) and non-coding (small nuclear and microRNA)-GEP, while in panel **B** unsupervised hierarchical clustering analysis of sCRC tumors without metastatic dissemination at diagnosis was used to graphically represent the accuracy (97%) of the expression levels of the 19 genes of the proposed GEP classifier to discriminate non-metastatic sCRC cases (colored orange;  $n = 25$ ) from sCRC which developed metastatic, liver disease during follow-up (colored yellow with orange frames;  $n = 10$ ).

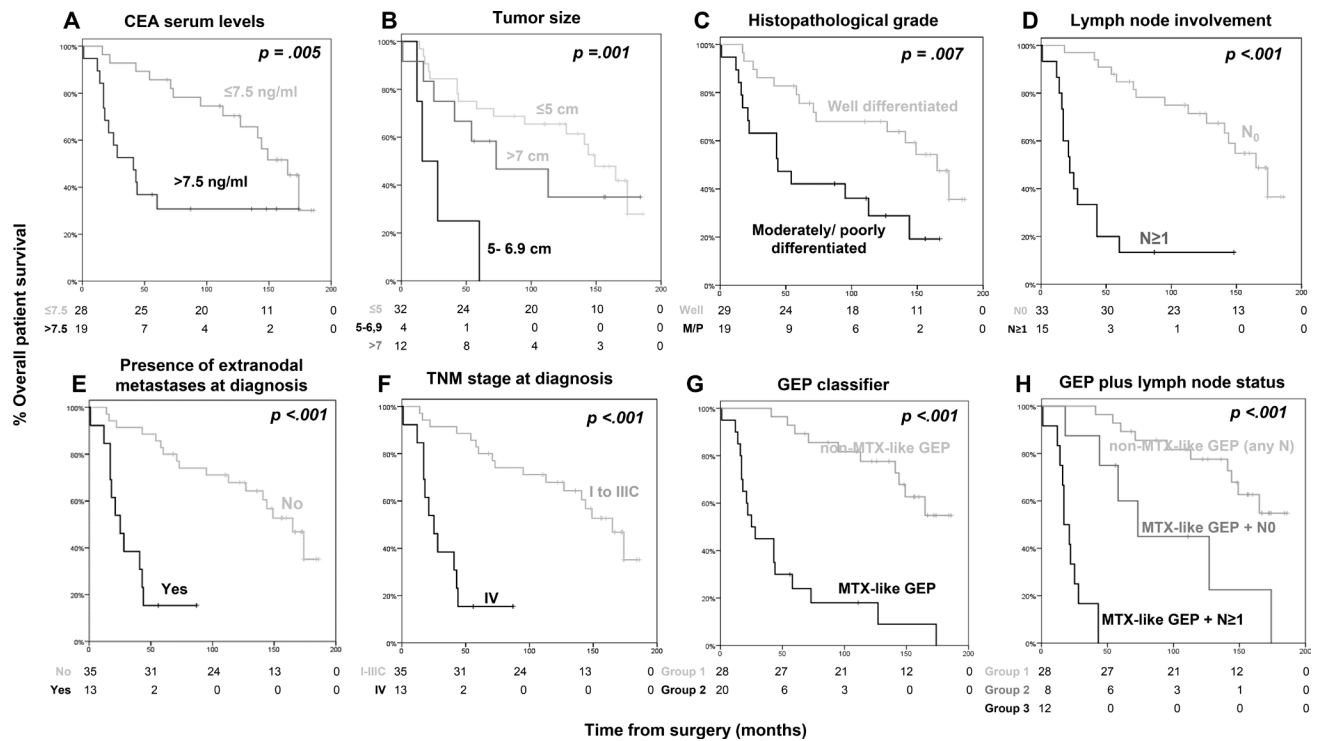

**Supplementary Figure 2: Clinical, biological and histopathological characteristics with a significant impact on overall survival of sCRC patients.** (A) carcinoembryonic antigen serum levels (CEA), (B) tumor size, (C) histopathological grade, (D) lymph node involvement, (E) occurrence of distant metastases at diagnosis, (F) TNM stage, (G) the GEP classifier built on the basis of those 19 coding and non-coding RNA genes that better discriminated metastatic from non-metastatic sCRC at diagnosis, and (H) the GEP plus lymph node status (presence ( $N \geq 1$ ) vs. absence ( $N_0$ ) of lymph node infiltration at diagnosis).

**Supplementary Table 1: Gene transcripts differentially expressed in primary metastatic vs. non-metastatic sCRC tumors ( $n = 23$  vs.  $n = 25$ , respectively) vs. non-tumoral colorectal tissues ( $n = 9$ ).** See Supplementary\_Table\_1

**Supplementary Table 2: Most representative molecular pathways involved in sCRC primary tumors as identified through analysis of the GEP of coding and non-coding RNAs shared by metastatic ( $n = 23$ ) and non-metastatic ( $n = 25$ ) sCRC primary tumors vs. non-tumoral colorectal tissues ( $n = 9$ )**

| KEGG functional pathway                                                          | Pathway ID code                                             | non-MTX sCRC                 |                                   | MTX sCRC                     |                                   |       |
|----------------------------------------------------------------------------------|-------------------------------------------------------------|------------------------------|-----------------------------------|------------------------------|-----------------------------------|-------|
|                                                                                  |                                                             | N. of genes (%) <sup>*</sup> | Corrected $p$ -value <sup>†</sup> | N. of genes (%) <sup>*</sup> | Corrected $p$ -value <sup>†</sup> |       |
| <b>Metabolism and gastrointestinal system</b>                                    | Fat digestion and absorption                                | 04975                        | 9 (21%)                           | .001                         | 8 (19%)                           | .001  |
|                                                                                  | Nitrogen metabolism                                         | 00910                        | 7 (32%)                           | <.001                        | 6 (27%)                           | .001  |
|                                                                                  | Ether lipid metabolism                                      | 00565                        | 7 (21%)                           | .005                         | 7 (21%)                           | .002  |
|                                                                                  | Glycerolipid metabolism                                     | 00561                        | 8 (17%)                           | .007                         | 6 (13%)                           | .02   |
|                                                                                  | Pentose and glucuronate interconversions                    | 00040                        | 5 (24%)                           | .01                          | 5 (24%)                           | .006  |
|                                                                                  | Steroid hormone biosynthesis                                | 00140                        | 7 (17%)                           | .01                          | 6 (14%)                           | .01   |
|                                                                                  | Metabolism of xenobiotics by cytochrome P450 <sup>(1)</sup> | 00980                        | 8 (14%)                           | .01                          | 6 (10%)                           | .04   |
|                                                                                  | Drug metabolism-cytochrome P450                             | 00982                        | 8 (14%)                           | .01                          | 6 (10%)                           | .04   |
|                                                                                  | Starch and sucrose metabolism                               | 00500                        | 6 (16%)                           | .02                          | 6 (16%)                           | .01   |
| <b>Intracellular signal transduction</b>                                         | PPAR signaling pathway                                      | 03320                        | 12 (17%)                          | <.001                        | 8 (11%)                           | .01   |
|                                                                                  | p53 signaling pathway                                       | 04115                        | 11 (17%)                          | .001                         | 8 (12%)                           | .01   |
|                                                                                  | TGF- $\beta$ signaling pathway                              | 04350                        | 10 (13%)                          | .01                          | 11 (14%)                          | .001  |
|                                                                                  | MAPK signaling pathway                                      | 04010                        | 21 (8%)                           | .02                          | 21 (8%)                           | .002  |
|                                                                                  | Calcium signaling pathway                                   | 04020                        | 15 (9%)                           | .03                          | 12 (7%)                           | .04   |
| <b>Cell communication, and intercellular signaling molecules and interaction</b> | Cytokine-cytokine receptor interaction <sup>(2)</sup>       | 04060                        | 30 (12%)                          | <.001                        | 26 (11%)                          | <.001 |
|                                                                                  | ECM-receptor interaction <sup>(1)</sup>                     | 04512                        | 13 (16%)                          | <.001                        | 13 (16%)                          | <.001 |
|                                                                                  | Gap junction                                                | 04540                        | 11 (13%)                          | .008                         | 9 (11%)                           | .01   |
|                                                                                  | Tight junction                                              | 04530                        | 12 (9%)                           | .04                          | 10 (8%)                           | .04   |
| <b>Tissue homeostasis</b>                                                        | Pancreatic secretion                                        | 04972                        | 13 (14%)                          | .003                         | 14 (15%)                          | <.001 |
|                                                                                  | Mineral absorption                                          | 04978                        | 8 (16%)                           | .009                         | 6 (12%)                           | .03   |
|                                                                                  | Aldosterone-regulated sodium reabsorption                   | 04960                        | 6 (15%)                           | .03                          | 6 (15%)                           | .01   |
|                                                                                  | Vascular smooth muscle contraction                          | 04270                        | 14 (13%)                          | .003                         | 11 (10%)                          | .01   |
| <b>Cell cycle, growth and death</b>                                              | Cell cycle                                                  | 04110                        | 28 (24%)                          | <.001                        | 20 (17%)                          | <.001 |
|                                                                                  | Oocyte meiosis                                              | 04114                        | 13 (12%)                          | .007                         | 9 (8%)                            | .04   |
|                                                                                  | Progesterone-mediated oocyte maturation                     | 04914                        | 10 (12%)                          | .02                          | 9 (11%)                           | .01   |
| <b>Cancer</b>                                                                    | Small cell lung cancer                                      | 05222                        | 12 (14%)                          | .003                         | 9 (11%)                           | .01   |
|                                                                                  | Pathways in cancer                                          | 05200                        | 26 (8%)                           | .009                         | 23 (7%)                           | .004  |
|                                                                                  | Bladder cancer                                              | 05219                        | 7 (18%)                           | .01                          | 8 (20%)                           | <.001 |
| <b>Intercellular transport and catabolism</b>                                    | Amoebiasis                                                  | 05146                        | 13 (14%)                          | .003                         | 14 (15%)                          | <.001 |
|                                                                                  | Malaria                                                     | 05144                        | 8 (17%)                           | .006                         | 6 (13%)                           | .02   |
|                                                                                  | Phagosome                                                   | 04145                        | 11 (10%)                          | .04                          | 9 (8%)                            | .04   |
| <b>Immune system</b>                                                             | Chemokine signaling pathway                                 | 04062                        | 21 (12%)                          | <.001                        | 20 (11%)                          | <.001 |
|                                                                                  | Rheumatoid arthritis                                        | 05323                        | 10 (14%)                          | .009                         | 10 (14%)                          | .002  |

<sup>\*</sup>The percentage of genes within a functional category is expressed as the ratio between the number of genes differentially expressed in the GEP assigned to a molecular pathway and the total number of genes which are annotated for that same pathway. <sup>†</sup> $p$ -value corrected for multiple hypothesis using the false discovery rate method of Benjamini and Hochberg. KEGG pathway results were obtained from both gene coding data analysis and simultaneous analysis of coding and non-coding gene data for (1) non-metastatic primary sCRC tumors or (2) metastatic sCRC tumors. PPAR: peroxisome proliferator-activated receptors; ECM: extracellular matrix; MAPK: mitogen-activated protein kinase.

**Supplementary Table 3: Detailed clinical and biological characteristics of each individual metastatic ( $n = 23$ ) and non-metastatic ( $n = 25$ ) colorectal cancer patient analyzed ( $n = 48$ )**

| Case ID | Gender | Age (year) | Site of primary tumor | Histological grade | Primary tumor size (cm) | TNM stage at diagnosis |      | N. of metastasis | Type of liver metastasis* | CEA serum levels (ng/ml) |
|---------|--------|------------|-----------------------|--------------------|-------------------------|------------------------|------|------------------|---------------------------|--------------------------|
| 1       | M      | 69         | Left colon            | Well               | 3.0                     | T3N0M0                 | IIA  | 1                | Metachronous              | 7.6                      |
| 2       | M      | 57         | Left colon            | Well               | 6.0                     | T3N1M1                 | IV   | >3               | Synchronous               | 30.9                     |
| 3       | M      | 77         | Left colon            | Well               | 5.5                     | T3N1M0                 | IIIB | 1                | Metachronous              | 244.9                    |
| 4       | F      | 80         | Left colon            | Well               | 3.0                     | T4N0M1                 | IV   | 1                | Synchronous               | 85.3                     |
| 5       | M      | 64         | Left colon            | Well               | 7.0                     | T3N0M1                 | IV   | >3               | Synchronous               | 256.0                    |
| 6       | M      | 75         | Rectum                | Well               | 4.0                     | T3N1M0                 | IIIB | 2                | Metachronous              | 589.2                    |
| 7       | F      | 62         | Rectum                | Well               | 7.5                     | T3N0M1                 | IV   | 1                | Synchronous               | 139.0                    |
| 8       | M      | 63         | Rectum                | Well               | 7.0                     | T3N2M1                 | IV   | 1                | Synchronous               | 23.2                     |
| 9       | M      | 77         | Rectum                | Well               | 9.0                     | T3N1M1                 | IV   | 1                | Synchronous               | 58.3                     |
| 10      | M      | 64         | Rectum                | Well               | 7.0                     | T3N0M0                 | IIA  | 1                | Metachronous              | 5.4                      |
| 11      | M      | 66         | Rectum                | Well               | 8.5                     | T3N0M0                 | IIA  | 1                | Metachronous              | 3.7                      |
| 12      | M      | 76         | Right colon           | Moderate           | 5.5                     | T3N1M1                 | IV   | >3               | Synchronous               | 43.9                     |
| 13      | M      | 62         | Right colon           | Moderate           | 3.0                     | T3N2M1                 | IV   | 3                | Synchronous               | 155.2                    |
| 14      | F      | 58         | Left colon            | Moderate           | 5.0                     | T4N2M1                 | IV   | >3               | Synchronous               | 501.0                    |
| 15      | F      | 75         | Left colon            | Moderate           | 9.0                     | T4N1M1                 | IV   | >3               | Synchronous               | 1145.0                   |
| 16      | M      | 61         | Left colon            | Moderate           | 3.0                     | T2N0M0                 | I    | 1                | Metachronous              | 1.2                      |
| 17      | F      | 76         | Rectum                | Moderate           | 2.5                     | T3N1M0                 | IIIB | 3                | Synchronous               | 149.8                    |
| 18      | F      | 49         | Rectum                | Moderate           | 6.5                     | T3N1M0                 | IIIB | 2                | Synchronous               | 6.8                      |
| 19      | M      | 74         | Rectum                | Moderate           | 5.0                     | T4N0M1                 | IV   | >3               | Synchronous               | 110.0                    |
| 20      | M      | 73         | Rectum                | Moderate           | 5.5                     | T3N1M0                 | IIIB | 1                | Synchronous               | 6.4                      |
| 21      | M      | 61         | Rectum                | Moderate           | 5.0                     | T3N2M0                 | IIIC | 1                | Metachronous              | 2.3                      |
| 22      | F      | 48         | Left colon            | Poor               | 4.0                     | T4N2M1                 | IV   | >3               | Synchronous               | 32.9                     |
| 23      | M      | 72         | Left colon            | Poor               | 4.0                     | T3N1M1                 | IV   | 2                | Synchronous               | 45.4                     |
| 24      | M      | 56         | Left colon            | Well               | 5                       | T3N0M0                 | IIA  | 0                |                           | 18                       |
| 25      | M      | 69         | Left colon            | Well               | 4.5                     | T4N0M0                 | IIB  | 0                |                           | 9.9                      |
| 26      | M      | 79         | Right colon           | Well               | 5                       | T3N0M0                 | IIA  | 0                |                           | 13.5                     |
| 27      | F      | 83         | Left colon            | Well               | 4                       | T2N0M0                 | I    | 0                |                           | 1.3                      |
| 28      | M      | 76         | Rectum                | Well               | 5                       | T3N0M0                 | IIA  | 0                |                           | 2.3                      |
| 29      | M      | 77         | Left colon            | Well               | 7                       | T3N0M0                 | IIA  | 0                |                           | 0.6                      |
| 30      | M      | 70         | Left colon            | Well               | 5                       | T2N0M0                 | I    | 0                |                           | 4.5                      |
| 31      | M      | 51         | Left colon            | Well               | 5                       | T4N0M0                 | IIB  | 0                |                           | 1.2                      |
| 32      | F      | 72         | Left colon            | Well               | 3                       | T2N0M0                 | I    | 0                |                           | 1.4                      |
| 33      | F      | 70         | Right colon           | Well               | 2.5                     | T3N0M0                 | IIA  | 0                |                           | 4.9                      |
| 34      | M      | 45         | Rectum                | Well               | 8                       | T4N0M0                 | IIB  | 0                |                           | 3.4                      |
| 35      | F      | 73         | Left colon            | Well               | 4.5                     | T4N0M0                 | IIB  | 0                |                           | 4.9                      |
| 36      | M      | 74         | Right colon           | Well               | 4.5                     | T3N0M0                 | IIA  | 0                |                           | 2.5                      |
| 37      | M      | 38         | Left colon            | Well               | 5                       | T3N0M0                 | IIA  | 0                |                           | 1                        |
| 38      | M      | 61         | Rectum                | Well               | 3                       | T2N0M0                 | I    | 0                |                           | 3.6                      |
| 39      | M      | 66         | Left colon            | Well               | 4                       | T2N0M0                 | I    | 0                |                           | 3.1                      |
| 40      | M      | 72         | Right colon           | Well               | 4                       | T4N0M0                 | IIB  | 0                |                           | 2                        |
| 41      | F      | 57         | Right colon           | Well               | 4                       | T3N0M0                 | IIA  | 0                |                           | 0.8                      |
| 42      | M      | 77         | Right colon           | Moderate           | 8                       | T3N0M0                 | IIA  | 0                |                           | 2.1                      |
| 43      | M      | 77         | Left colon            | Moderate           | 5                       | T3N0M0                 | IIA  | 0                |                           | 3.4                      |
| 44      | M      | 67         | Right colon           | Moderate           | 14                      | T4N0M0                 | IIB  | 0                |                           | 7.3                      |
| 45      | F      | 77         | Right colon           | Moderate           | 5                       | T3N0M0                 | IIA  | 0                |                           | 6.3                      |
| 46      | M      | 66         | Left colon            | Moderate           | 3.5                     | T2N0M0                 | I    | 0                |                           | 1.9                      |
| 47      | M      | 63         | Left colon            | Moderate           | 5                       | T2N0M0                 | I    | 0                |                           | 1.2                      |
| 48      | F      | 78         | Right colon           | Poor               | 7                       | T4N0M0                 | IIB  | 0                |                           | 1.7                      |

\*Synchronous metastasis were defined as these metastasis that were either present already at diagnosis or that developed during the first 8 months after colorectal surgery. M: male; F: female; CEA: carcinoembryonic antigen.
